1 **Mouse hepatitis virus nsp14 exoribonuclease activity is required for**  
2 **resistance to innate immunity**

3  
4 James Brett Case,<sup>a,c</sup> Yize Li,<sup>d</sup> Ruth Elliott,<sup>d</sup> Xiaotao Lu,<sup>b,c</sup> Kevin W. Graepel,<sup>a,c</sup> Nicole R.  
5 Sexton,<sup>a,b,c</sup> Everett Clinton Smith,<sup>e</sup> Susan R. Weiss,<sup>d</sup> and Mark R. Denison<sup>a,b,c\*</sup>

6  
7 Departments of Pathology, Microbiology, and Immunology<sup>a</sup> and Pediatrics<sup>b</sup> and Elizabeth B.  
8 Lamb Center for Pediatric Research,<sup>c</sup> Vanderbilt University Medical Center, Nashville,  
9 Tennessee, USA; Department of Microbiology,<sup>d</sup> Perelman School of Medicine, University of  
10 Pennsylvania, Philadelphia, Pennsylvania, USA; Department of Biology,<sup>e</sup> The University of the  
11 South, Sewanee, Tennessee, USA.

12  
13 **\*Corresponding author:** Mark R. Denison

14 **E-mail:** [mark.denison@vanderbilt.edu](mailto:mark.denison@vanderbilt.edu)

15  
16 **Running title:** nsp14 ExoN activity is required for resistance to IFN

17  
18 **Keywords:** coronavirus, MHV, exoribonuclease, ExoN, innate immunity, interferon

19  
20 **Word Count:** (246 abstract; 123 importance)

21

22 **ABSTRACT**

23 Coronaviruses (CoV) are positive-sense RNA viruses that infect numerous mammalian and avian  
24 species and are capable of causing severe and lethal disease in humans. CoVs encode several  
25 innate immune antagonists that interact with the host innate immune response to facilitate  
26 efficient viral replication. CoV non-structural protein 14 (nsp14) encodes 3'-to-5'  
27 exoribonuclease activity (ExoN), which performs a proofreading function and is required for  
28 high-fidelity replication. Outside of the order *Nidovirales*, arenaviruses are the only RNA viruses  
29 that encode an ExoN, which functions to degrade dsRNA replication intermediates. In this study,  
30 we tested the hypothesis that CoV ExoN may also function to antagonize the innate immune  
31 response. We demonstrate that viruses lacking ExoN activity [ExoN(-)] are sensitive to cellular  
32 pretreatment with interferon beta (IFN- $\beta$ ) in a dose-dependent manner. In addition, ExoN(-) virus  
33 replication was attenuated in wild-type bone marrow-derived macrophages (BMMs) and partially  
34 restored in interferon alpha/beta receptor deficient (IFNAR $^{-/-}$ ) BMMs. ExoN(-) virus replication  
35 did not result in IFN- $\beta$  gene expression, and in the presence of an IFN- $\beta$ -mediated antiviral state,  
36 ExoN(-) viral RNA levels were not substantially reduced relative to untreated. However, ExoN(-  
37 ) virus generated from IFN- $\beta$  pretreated cells had reduced specific infectivity and decreased  
38 relative fitness, suggesting that ExoN(-) virus generated during an antiviral state is less viable to  
39 establish a subsequent infection. Overall, our data suggest MHV ExoN activity is required for  
40 resistance to the innate immune response and antiviral mechanisms affecting the viral RNA  
41 sequence and/or an RNA modification act on viruses lacking ExoN activity.

42

43

44 **IMPORTANCE**

45 CoVs encode multiple antagonists that prevent or disrupt an efficient innate response.  
46 Additionally, no specific antiviral therapies or vaccines currently exist for human CoV  
47 infections. Therefore, the study of CoV innate immune antagonists is essential for understanding  
48 how CoVs overcome host defenses and to maximize potential therapeutic interventions. Here, we  
49 sought to determine the contributions of nsp14 ExoN activity in the induction of and resistance  
50 to the innate immune response. We show that viruses lacking nsp14-ExoN activity are more  
51 sensitive to restriction by exogenous IFN- $\beta$  and that viruses produced in the presence of an  
52 antiviral state are less capable of establishing a subsequent viral infection. Our results support the  
53 hypothesis that MHV ExoN activity is required for resistance to the innate immune response.

54

55

56

57

58

59

60

61

62

63

64

65

66

## 67 INTRODUCTION

68           The innate immune response within a mammalian cell is the first line of defense against  
69 an invading pathogen. However, as obligate intracellular parasites, viruses have evolved  
70 numerous mechanisms to prevent and antagonize innate detection by host cells. Coronaviruses  
71 (CoVs), which are the largest known positive-sense, single-stranded RNA viruses, encode  
72 several type I interferon (IFN) antagonists. Many of these antagonists prevent the induction of  
73 IFN, while others mediate resistance to the effects of IFN (1-3). Upon secretion from a cell, IFNs  
74 bind to cell surface-expressed IFN- $\alpha/\beta$  receptors (IFNARs) in an autocrine and paracrine manner.  
75 Subsequently, an IFN signaling cascade utilizing the Janus kinase and signal transducer and  
76 activator of transcription pathway leads to the induction and expression of hundreds of interferon  
77 stimulated genes (ISGs) that act to limit or prevent viral replication and spread (4). However,  
78 during CoV infection, nonstructural protein (nsp) 1 antagonizes the innate immune response by  
79 degrading host mRNAs and suppressing IFN beta (IFN- $\beta$ ) expression (5, 6). The nsp3 of severe  
80 acute respiratory syndrome coronavirus (SARS-CoV) prevents IRF3 phosphorylation and NF- $\kappa$ B  
81 signaling (7). In addition, SARS-CoV nsp3 encodes deubiquitinating and deISGylating activities  
82 (3, 8). CoV viral RNA evades innate detection by pattern recognition receptors (PRRs) such as  
83 MDA5, and antiviral effectors, such as IFIT1, through formation of a 5' cap-1 structure by  
84 encoding N7-methyltransferase and 2'O-methyltransferase activities within nsp14 and nsp16,  
85 respectively (9, 10). Murine hepatitis virus (MHV) and Middle East respiratory syndrome  
86 coronavirus (MERS-CoV) also encode 2'-5' phosphodiesterases that degrade 2'-5'  
87 oligoadenylates, which are key signaling molecules generated by oligoadenylate synthetase  
88 (OAS) in response to innate detection of dsRNA that subsequently activate RNase L (11). Most

89 recently, a CoV nsp15 endonuclease activity (EndoU) mutant virus was shown to have increased  
90 dsRNA levels, suggesting that nsp15 EndoU reduces dsRNA levels during infection (12).

91 CoV nsp14 encodes 3'-to-5' exoribonuclease (ExoN) and N7-methyltransferase (N7-  
92 MTase) activities (9, 13). CoV nsp14 N7-MTase activity is essential for efficient translation of  
93 the viral genome and preventing innate detection (14). In addition, initial biochemical studies of  
94 nsp14 ExoN activity demonstrated that ExoN has a preference for dsRNA and the capacity to  
95 excise 3' end misincorporated nucleotides (13). Moreover, nsp14 ExoN activity is required for  
96 high-fidelity replication. The CoV nsp14 ExoN is a member of the DE-D-Dh superfamily of  
97 DNA and RNA exonucleases, so named for the three motifs of four active site residues (13).  
98 *Betacoronaviruses* SARS-CoV and MHV expressing engineered, ExoN-inactivating  
99 substitutions at active site residues in Motif I (DE→AA) [ExoN(-)] demonstrate increased  
100 mutation frequencies and are profoundly sensitive to inhibition by RNA mutagens (15, 16).  
101 Additionally, SARS-CoV ExoN(-) virus is attenuated *in vivo* (17). Interestingly, outside of the  
102 order *Nidovirales*, the only other known RNA virus-encoded 3'-to-5' exoribonucleases are found  
103 in the *Arenaviridae* family of viruses. Lassa fever virus nucleoprotein ExoN is not thought to  
104 participate in fidelity regulation, but rather it participates in immune evasion by degrading  
105 dsRNA and thereby prevents antigen-presenting cell-mediated NK cell activation (18-20).  
106 Recently, in the *Alphacoronavirus* transmissible gastroenteritis virus (TGEV), a mutation in the  
107 nsp14 ExoN zinc finger was shown to generate lower levels of dsRNA compared to wild-type  
108 (WT) TGEV. However, in that study viruses with mutations in ExoN active site motifs were  
109 non-viable and therefore, could not be directly tested for effects on innate immunity (21).

110 Here, we demonstrate that viruses lacking ExoN activity were sensitive to the effects of  
111 IFN pretreatment. In addition, for viruses lacking ExoN activity, replication was restricted in

112 wild-type bone marrow derived macrophages (B6, BMMs) but restored in interferon alpha/beta  
113 receptor deficient (IFNAR<sup>-/-</sup>) BMMs. Despite an increased sensitivity to the effects of IFN  
114 treatment, MHV ExoN mutants failed to induce detectable IFN- $\beta$  gene expression or RNase L-  
115 mediated ribosomal RNA (rRNA) degradation and only a limited decrease in viral RNA  
116 accumulation was observed. Finally, ExoN(-) virus replicated in the presence of an IFN- $\beta$ -  
117 mediated antiviral state had both a decreased specific infectivity and decreased relative fitness  
118 compared to untreated ExoN(-) virus. Thus, nsp14 ExoN appears to block or correct the  
119 restriction of MHV infection by an IFN-mediated mechanism that may involve damaging  
120 nascent viral RNA and affecting subsequent infectivity.

121

122 **RESULTS**

123 **Viruses lacking ExoN activity are sensitive to the effects of IFN- $\beta$ .** Binding of type I  
124 interferon to the IFNAR receptor on the cell surface leads to a Jak/STAT signaling cascade that  
125 ultimately results in the up-regulation and expression of hundreds of antiviral ISGs (4). In  
126 addition, WT-MHV replication has been shown to be relatively resistant to the effects of IFN (1,  
127 3, 22). To determine whether the ExoN activity of MHV nsp14 was required for resistance to  
128 IFN, we pretreated murine delayed brain tumor (DBT) cells with increasing concentrations of  
129 mouse IFN- $\beta$  for 18 h prior to infecting with WT-MHV or ExoN(-) virus at a multiplicity of  
130 infection (MOI) of 1 plaque-forming unit (PFU) per cell (Fig. 1A). In response to IFN- $\beta$   
131 pretreatment, WT-MHV viral titer decreased by approximately 1 log<sub>10</sub> as previously reported (1).  
132 In contrast, ExoN(-) viral titer demonstrated a dose-dependent decrease and resulted in an  
133 approximately 3 log<sub>10</sub> decrease in viral titer relative to untreated ExoN(-) viral titers. The ExoN  
134 activity of nsp14 is conferred by active site residues present in 3 different motifs within the  
135 ExoN domain (23). Therefore, to determine whether the observed sensitivity to IFN- $\beta$   
136 pretreatment for ExoN(-) virus in Fig. 1A was due specifically to the absence of ExoN activity in  
137 nsp14, we engineered and recovered a virus encoding only an aspartic acid to alanine  
138 substitution in Motif III [ExoN3(-)]. Previously, we have demonstrated that viruses lacking  
139 ExoN activity have decreased replication fidelity and are sensitive to the RNA mutagen 5-  
140 fluorouracil (5-FU) (16). Hence, 5-FU sensitivity is an *in vitro* indicator of ExoN activity.  
141 Therefore, first, we tested whether ExoN3(-) and ExoN(-) demonstrated similar sensitivity to 5-  
142 FU to ensure that the ExoN activity of ExoN3(-) virus had been ablated. Similar to ExoN(-),  
143 ExoN3(-) viral replication in cells treated with increasing concentrations of 5-FU demonstrated a  
144 dose-dependent decrease in viral titer relative to vehicle treated cells (Fig. 1B). Further, ExoN(-)

145 and ExoN3(-) displayed similar sensitivities to pre-treatment with 100 or 500 U/mL IFN- $\beta$   
146 following infection at an MOI of 1 PFU/cell (Fig. 1C). Thus, these data suggest nsp14 ExoN  
147 activity is required for resistance to the effects of IFN- $\beta$  pretreatment and subsequent up-  
148 regulation and expression of ISGs.

149

150 **Increased replication capacity does not confer resistance to the effects of IFN- $\beta$**   
151 **pretreatment for viruses lacking ExoN activity.** ExoN(-) virus demonstrates an approximately  
152 2 h delay in exponential replication and a 1 log<sub>10</sub> decrease in peak titer relative to WT-MHV  
153 (15). Therefore, we tested whether the IFN sensitivity phenotype observed for ExoN(-) and  
154 ExoN3(-) viruses is due to the decreased replication capacity of these viruses. To do so, we  
155 utilized an ExoN(-) virus developed by our lab that has been blindly passaged in DBT cells for  
156 250 passages [ExoN(-) P250] (24). The replication capacity of the resulting ExoN(-) P250 virus  
157 exceeds that of WT-MHV (Fig. 2A). However, despite increased replication capacity, ExoN(-)  
158 P250 demonstrated similar sensitivity to IFN- $\beta$  pretreatment as ExoN(-) virus (Fig. 2A and B).  
159 Hence, the IFN- $\beta$  sensitivity phenotype of viruses lacking ExoN activity is not dependent on  
160 viral replication capacity but instead, is directly associated with a specific function of nsp14  
161 ExoN that is required for efficient replication in the presence of an IFN- $\beta$ -mediated antiviral  
162 state.

163

164 **Nsp14 ExoN activity is required for replication in wild-type B6 BMMs.** We next wanted to  
165 test whether ExoN activity was required for IFN resistance in primary innate immune cells, such  
166 as BMMs. Replication of WT-MHV in primary BMMs is well described, and data suggest that  
167 wild-type B6 BMMs (B6) express many PRRs and ISGs at a higher basal level than many mouse



168 cell lines (3, 25, 26). In contrast, BMMs lacking the IFNAR receptor (IFNAR<sup>-/-</sup>) have lower  
169 basal and expressed levels of ISGs; thus, making B6 and IFNAR<sup>-/-</sup> BMMs excellent cell types  
170 for interrogating the role of ExoN activity on viral replication and antagonism of the innate  
171 immune response (25). BMMs from B6 or IFNAR<sup>-/-</sup> mice were generated and infected with  
172 WT-MHV or ExoN(-) virus at an MOI of 1 PFU/cell. Samples were harvested at the indicated  
173 time points, and viral titers were determined by plaque assay (Fig. 3A). WT-MHV replication  
174 increased gradually in both B6 and IFNAR<sup>-/-</sup> BMMs at each time-point post-infection. In  
175 contrast, ExoN(-) virus replication in B6 BMMs was only detectable at 6 and 9 h post-infection.  
176 However, when IFNAR<sup>-/-</sup> BMMs were infected with ExoN(-) virus, viral titers were partially  
177 restored and increased at each time point post-infection. To further test the replication of viruses  
178 lacking ExoN activity and the effect of an increased replication capacity in BMMs, B6 and  
179 IFNAR<sup>-/-</sup> BMMs were infected with WT-MHV or ExoN(-) P250 viruses at an MOI of 1  
180 PFU/cell. Similar to Fig. 3A, WT-MHV viral titers steadily increased in B6 and IFNAR<sup>-/-</sup>  
181 BMMs at each time-point post-infection (Fig. 3B). However, similar to ExoN(-) virus, ExoN(-)  
182 P250 virus replication in B6 BMMs was restricted and not detected beyond 9 h post-infection. In  
183 addition, ExoN(-) P250 virus replication in IFNAR<sup>-/-</sup> BMMs was restored to similar levels as  
184 WT-MHV. These data show that ExoN activity is required for replication in B6 BMMs. Further,  
185 they suggest that restriction of ExoN(-) or ExoN(-) P250 is mediated by a gene or genes down-  
186 stream of IFNAR.

187

188 **Loss of ExoN activity does not result in the induction of IFN and replication is not rescued**  
189 **by RNase L/PKR deficiency.** Upon detection of a pathogen-associated molecular pattern  
190 (PAMP) by innate sensors, signaling pathways lead to transcription factor activation and nuclear

191 translocation resulting in expression of IFN- $\beta$  mRNA (4). WT-MHV is well known to prevent or  
192 delay the induction of IFN expression (3, 22). However, ExoN activity may help prevent the  
193 detection of a PAMP, namely dsRNA, which has been shown to be increased in an nsp15 EndoU  
194 mutant (12). Therefore, to determine whether the loss of ExoN activity resulted in the generation  
195 and subsequent detection of a PAMP, we determined the level of IFN- $\beta$  gene expression in DBT  
196 cells infected with mock, WT-MHV, ExoN(-), or ExoN(-) P250 virus at an MOI of 0.1 PFU/ cell  
197 (Fig. 4A). In addition, we infected DBT cells with Sendai virus (SenV), a positive control and a  
198 potent inducer of IFN, at an MOI of 200 HA units/ml. SenV infection resulted in IFN expression  
199 by 3 h post-infection and peaked between 9 and 12 h post-infection prior to returning nearly to  
200 mock infected levels by 24 h post-infection, demonstrating that DBT cells are capable of  
201 expressing IFN- $\beta$ . In contrast, no CoV infection, regardless of whether intact ExoN activity was  
202 present, resulted in IFN- $\beta$  gene expression over mock-infected cells with the exception of WT-  
203 MHV at 3 h post-infection. Further, upon detection of dsRNA by OAS and subsequent activation  
204 of RNase L, viral and cellular RNAs are degraded as an antiviral mechanism (4). To determine  
205 whether infection with ExoN(-) virus activates RNase L, DBT cells were pretreated with 0 or 50  
206 U/ml mouse IFN- $\beta$  and infected with WT-MHV or ExoN(-) virus at an MOI of 1 PFU/cell or  
207 transfected with 25 $\mu$ g/ml poly I:C, a dsRNA surrogate. At the indicated times post-infection, cell  
208 lysates were harvested, total RNA extracted, and the integrity of cellular rRNA determined using  
209 a bioanalyzer (Fig. 4B). Transfection of DBT cells with poly I:C resulted in rRNA degradation,  
210 whereas, infection of DBT cells with WT-MHV or ExoN(-) virus did not result in rRNA  
211 degradation under any tested conditions. Lastly, when B6 or RNase L  $-/-$  / PKR  $-/-$  BMMs (RL  $-$   
212  $-$  / PKR  $-/-$ ) were infected with ExoN(-) virus, replication was restricted (Fig. 4C). In contrast to  
213 infection of B6 BMMs, ExoN(-) viral titer from RL  $-/-$  / PKR  $-/-$  BMMs was detectable at 12 and

214 24 h post-infection. However, viral yield was minimal. These data suggest that loss of nsp14  
215 ExoN activity does not lead to the transcriptional activation of IFN- $\beta$  or a notable dsRNA sensor  
216 such as OAS/RNase L during infection of DBT cells. In addition, BMMs deficient in the  
217 antiviral effectors RNase L and PKR were not sufficient to restore ExoN(-) viral replication.  
218  
219 **IFN treatment does not substantially alter ExoN(-) viral RNA accumulation or particle**  
220 **release.** Since ExoN activity is required for resistance to IFN but had no effect on IFN induction,  
221 we sought to discern the stage of viral replication that was restricted by IFN- $\beta$  treatment. To  
222 determine the effect of IFN- $\beta$  pretreatment on viral RNA accumulation, DBT cells were  
223 pretreated with 0 or 100 U/ml mouse IFN- $\beta$  for 18 h and subsequently infected with WT-MHV  
224 or ExoN(-) virus at an MOI of 1 PFU/cell. At the indicated times post-infection, the number of  
225 genomic RNA copies present were determined by qRT-PCR. IFN- $\beta$  pretreatment had minimal  
226 effect on the accumulation of WT-MHV genomic RNA (Fig. 5A). Whereas ExoN(-) genomic  
227 RNA accumulation is delayed relative to WT-MHV (15), pretreatment with IFN- $\beta$  did not  
228 substantially decrease ExoN(-) genomic RNA levels (Fig. 5A). In addition, we determined the  
229 effects of IFN- $\beta$  pretreatment on the levels of subgenomic viral RNA. For both WT-MHV and  
230 ExoN(-) viruses, IFN- $\beta$  pretreatment did not substantially reduce subgenomic RNA levels at any  
231 time-point (Fig. 5B). These data indicate that IFN pretreatment did not result in the gross  
232 degradation or inhibition of ExoN(-) or ExoN(-) P250 viral RNA accumulation. While slight  
233 reductions in viral RNA could explain a small portion of the IFN phenotype, these data suggest  
234 that decreased replication or transcription is not the primary driver of ExoN(-) IFN sensitivity.

235         Since pretreatment of DBT cells with IFN- $\beta$  does not grossly alter ExoN(-) viral RNA  
236 accumulation but does reduce ExoN(-) viral titers, we sought to determine whether IFN

237 pretreatment prior to infection resulted in a measurable difference in the number of viral particles  
238 released from WT-MHV or ExoN(-) infected cells. DBT cells were pretreated with 0 or 100  
239 U/ml mouse IFN- $\beta$  for 18 h and subsequently infected with WT-MHV or ExoN(-) virus at an  
240 MOI of 1 PFU/cell. At 12 h post-infection, cell culture supernatants were harvested and an  
241 aliquot of two equal volumes were removed. From the first volume of each sample, RNA was  
242 extracted and used to perform one-step qRT-PCR to determine the number of genome RNAs  
243 present, and hence, the number of genome RNA containing particles present in the given volume  
244 of supernatant (Fig. 5C). The second volume was saved for a plaque assay as described below.  
245 Pretreatment of cells with IFN- $\beta$  resulted in approximately a 1 log<sub>10</sub> decrease in the number of  
246 supernatant viral particles for both WT-MHV and ExoN(-) viruses compared to the number of  
247 supernatant viral particles from untreated cells, demonstrating that IFN pretreatment affects the  
248 release of WT-MHV and ExoN(-) virus particles equally (Fig. 5D). Thus, these data suggest that  
249 IFN pretreatment does not restrict the primary replication of viruses lacking ExoN activity, but  
250 rather, renders them potentially inadequate for subsequent infection.

251  
252 **ExoN(-) virus progeny generated in the presence of an IFN induced-antiviral state have**  
253 **decreased specific infectivity and fitness upon subsequent infection.** While many ISGs  
254 antagonize viral replication, some could alter the infectivity of progeny particles (27, 28). To test  
255 whether IFN pretreatment affected the infectivity of ExoN(-) viral particles, the remaining cell  
256 culture supernatant volume described above was used to perform a plaque assay to determine the  
257 number of PFUs present (data not shown). Using the number of particles determined in Fig. 5C  
258 and the number of PFUs present in an equivalent volume; we calculated the specific infectivity,  
259 or particle-to-PFU ratio, of each virus generated under each condition (Fig. 6A). Regardless of

260 IFN- $\beta$  pretreatment during the initial infection, the specific infectivity of WT-MHV was  
261 approximately 10 particles per 1 PFU upon subsequent infection. Infection of untreated DBT  
262 cells with ExoN(-) virus resulted in a similar particle to PFU ratio as WT-MHV during  
263 subsequent infection. In contrast, when DBT cells were pretreated with IFN- $\beta$  prior to initial  
264 infection with ExoN(-) virus, the resulting specific infectivity of ExoN(-) virus was 100 particles  
265 per 1 PFU, a significant decrease in specific infectivity. Therefore, ExoN(-) virus generated in  
266 the presence of an IFN- $\beta$ -mediated antiviral state requires 10-fold more genome RNA containing  
267 particles to generate 1 PFU than WT-MHV generated in cells pretreated with or without IFN or  
268 ExoN(-) virus generated in untreated cells. These data suggest that the IFN-mediated restriction  
269 of ExoN(-) virus in DBT cells occurs at the level of subsequent infection by reducing particle  
270 infectivity.

271         Next, we tested whether the effects of IFN on ExoN(-) viruses were intrinsic to the  
272 viruses produced. To do so, we performed a co-infection assay, which utilized WT-MHV and  
273 ExoN(-) viruses harboring 10 silent mutations in the nsp2-coding region (WT silent and ExoN(-)  
274 silent, respectively) along with WT-MHV and ExoN(-) viruses. The genome RNAs of the silent  
275 viruses are recognized exclusively by a separate probe than the one used to detect the “WT” nsp2  
276 probe-binding region of WT-MHV or ExoN(-) viruses (24). Thus, allowing WT silent and  
277 ExoN(-) silent to act as internal controls for a co-infection assay under identical conditions. DBT  
278 cells were pretreated with 0 or 100 U/ml mouse IFN- $\beta$  for 18 h and subsequently infected with  
279 WT-MHV or ExoN(-) virus at an MOI of 1 PFU/cell. At 12 h post-infection, total cell culture  
280 supernatants were collected. The number of viral particles present in a representative aliquot was  
281 determined from purified virion genome RNA by one-step qRT-PCR. In addition, we determined  
282 the number of genome RNA containing particles in an equivalent volume of WT silent or ExoN(-)

283 ) silent viral p1 stock tubes. Using the calculated number of genome RNA-containing viral  
284 particles, we added an equal number of WT-MHV viral particles generated in the absence of IFN  
285 pretreatment to WT silent viral particles and an equal number of WT-MHV viral particles  
286 generated in the presence of IFN pretreatment to WT silent viral particles. This same set-up was  
287 repeated for ExoN(-) viral particles generated in the presence or absence of IFN pretreatment  
288 with ExoN(-) silent viral particles. Finally, each combination was used to infect a fresh  
289 monolayer of untreated DBT cells. At 24 h post-co-infection, total cell culture supernatants were  
290 collected and virion genome RNA was extracted to determine the number of supernatant viral  
291 particles present from each combination of input viruses by one-step qRT-PCR and is reported as  
292 the change in fitness relative to the respective silent virus standard (Fig. 6B). WT-MHV particles  
293 generated in the presence of IFN pretreatment generated a similar number of viral particles over  
294 the course of co-infection as WT-MHV generated in the absence of IFN pretreatment relative to  
295 their respective silent standards. However, the number of viral particles present from ExoN(-)  
296 virus generated in the presence of IFN pretreatment during the course of co-infection decreased  
297 by approximately 1.5 log<sub>10</sub> in comparison with ExoN(-) viral particles generated in the absence  
298 of IFN pretreatment relative to their respective silent standards. These data indicate that a loss in  
299 nsp14 ExoN activity sensitizes viruses to IFN pretreatment and reduces the infectivity and fitness  
300 of progeny during subsequent rounds of infection in the absence of an antiviral state.

301

## 302 **DISCUSSION**

303 CoVs encode multiple IFN antagonists that prevent the induction of or mediate resistance to the  
304 innate immune response; thus, allowing efficient viral replication early during infection (3).  
305 Moreover, an insufficient innate immune response has been proposed to be a major contributor

306 to SARS-CoV pathogenesis (29). In this study, we sought to determine the contributions of  
307 nsp14 ExoN activity in the induction of and resistance to the innate immune response. We  
308 demonstrate that ExoN(-) virus is sensitive to pretreatment with IFN- $\beta$ . Because ExoN3(-) and  
309 ExoN(-) P250 viruses were also sensitive to the effects of IFN, we conclude that IFN sensitivity  
310 is specifically due to loss of ExoN activity.

311 Because the ExoN activity of the Lassa fever virus nucleoprotein degrades dsRNA  
312 intermediates (18, 19), we hypothesized that CoV nsp14 ExoN could function in a similar  
313 manner. If nsp14 ExoN is degrading viral dsRNA, ExoN inactivation should increase  
314 intracellular dsRNA accumulation, resulting in a concomitant increase in IFN- $\beta$  expression or  
315 activation of RNase L during infection. We neither observed IFN- $\beta$  up-regulation nor RNase L  
316 activation over the course of ExoN(-) virus infection (Fig. 4A and B), and rRNA was intact at all  
317 time-points tested (Fig. 4B). Therefore, at least two possible explanations exist: 1.) ExoN does  
318 not function to degrade dsRNA or 2.) ExoN does degrade dsRNA, but the detection of this  
319 PAMP is unchanged during ExoN(-) virus infection due to sufficient antagonism by other CoV  
320 proteins. Basal OAS expression levels correlate with RNase L activation (30). Thus, we  
321 pretreated DBTs with IFN- $\beta$  to up-regulate OAS and RNase L expression. However, rRNA  
322 degradation was only observed in cells transfected with poly I:C (Fig. 4B). Further, nsp15  
323 EndoU and NS2 phosphodiesterase activities were intact during all of our experiments. Thus, it  
324 is possible that in the absence of nsp14 ExoN activity, other CoV innate antagonists were  
325 sufficient to prevent innate detection by the cell or prevent the induction of a detectable signal in  
326 the experiments we performed. However, one would expect the endonucleolytic products of  
327 nsp15 to be smaller dsRNAs that could still activate RIG-I or MDA5, similar to RNase L  
328 products, unless another RNA degradation mechanism were in place (4, 31). In addition, despite

329 an intact NS2 phosphodiesterase, nsp15 mutants still activate RNase L-mediated rRNA  
330 degradation (12). Lastly, when RNaseL <sup>-/-</sup> / PKR <sup>-/-</sup> BMMs were infected with ExoN(-) virus,  
331 viral replication was not rescued, suggesting that RNase L and PKR are not required for ExoN(-)  
332 virus restriction (Fig. 4C). Moreover, these data suggest dsRNA is not detected and the antiviral  
333 effectors RNaseL and PKR are not activated during ExoN(-) virus infection.

334         During our study, Becares et al. reported that a TGEV nsp14 zinc-finger mutant  
335 modulated the innate immune response of swine testis cells by reducing the levels of dsRNA and  
336 induction of IFN (21). Unlike TGEV, *Betacoronaviruses* such as SARS-CoV and MHV, do not  
337 induce IFN expression in most cell types (1-3) (Fig.4A). Interestingly, TGEV ExoN active site  
338 mutants were non-viable; although, this is not the first report of non-viable ExoN active site  
339 residue mutants in *Alphacoronaviruses* (21). In the initial report of CoV nsp14 ExoN activity,  
340 human CoV 229E ExoN active site mutants were also non-viable, suggesting a common essential  
341 function for nsp14 ExoN in *Alphacoronavirus* replication and/or innate antagonism (13).  
342 Altogether, the possibility of a common innate immune antagonism function for nsp14 across  
343 *Alpha-* and *Beta-CoVs* is apparent but clearly differing requirements exist that may be dependent  
344 on the CoV genus and cell types used.

345         Our results clearly demonstrate that viruses lacking ExoN activity are sensitive to IFN- $\beta$   
346 pretreatment in a dose-dependent manner (Fig. 1A,C and Fig. 2). Further, replication of viruses  
347 lacking ExoN activity was dependent on the capacity of BMMs to express genes downstream of  
348 IFNAR signaling (Fig. 3). This is due to the fact that B6 and IFNAR<sup>-/-</sup> cells have different levels  
349 of basal ISG expression and thus, two very different intracellular environments for viral  
350 replication to occur (3, 25, 26). In IFNAR<sup>-/-</sup> BMMs, ExoN(-) and ExoN(-) P250 virus replication  
351 capacity was restored to levels approaching or exceeding WT-MHV levels (Fig. 3). Further, our



352 specific infectivity (Fig. 6A) and co-infection (Fig. 6B) data show that ExoN(-) virus generated  
353 in the presence of an antiviral state is less viable upon subsequent infection. Altogether, our  
354 results suggest that an ISG or ISGs is (are) acting on ExoN(-) virus, specifically resulting in  
355 progeny that are less viable upon subsequent infection. Thus, it will be interesting to determine  
356 the specific ISG or ISGs responsible for mediating the observed restriction. In addition, it will be  
357 important to determine whether a greater proportion of the incoming ExoN(-) viral particles are  
358 strictly non-viable or whether cells are now sensing the progeny ExoN(-) viruses and inhibiting  
359 replication. Due to the pleiotropic nature of IFN- $\beta$ , more than one mechanism may be acting. To  
360 date, the majority of our understanding of nsp14 ExoN activity is in the context of proofreading  
361 during CoV replication (13, 15, 16, 32). CoVs lacking ExoN activity demonstrate an increase in  
362 mutation frequency relative to WT (15, 16). Thus, it is possible that ExoN(-) virus replication in  
363 IFN pretreated cells results in further alteration of ExoN(-) virus mutation frequency. Certainly,  
364 an increase or decrease in mutation frequency could impair viral replication during a subsequent  
365 infection. In addition, an ISG may act to hypermutate the large CoV genome in the absence of  
366 ExoN activity, rendering viral progeny less viable. ISGs that increase viral mutation frequency  
367 have been described such as adenosine deaminase acting on RNA 1 (ADAR1) and  
368 apolipoprotein B mRNA editing enzyme, catalytic polypeptide-like 3G (APOBEC3G) (27, 28).  
369 Further, another ISG, SAMHD1, may inhibit HIV replication by limiting nucleotide pools, a  
370 known contributor to increased viral mutation frequency (33-35). Moreover, other possible  
371 mechanisms outside of altered mutation frequency exist. For instance, in the absence of ExoN  
372 activity, terminal RNA modifications, recombination, and/or replicase protein interactions  
373 mediated by nsp14 ExoN may be disrupted to a greater extent in the presence of an IFN- $\beta$ -  
374 mediated antiviral state.

375            Since CoVs encode the largest genome known for RNA viruses, they have the luxury of  
376 encoding multiple IFN antagonists that limit the capacity of a cell to detect and respond to  
377 infection. Collectively, our data suggest that MHV nsp14 ExoN activity is a contributor to CoV  
378 innate immune antagonism. We clearly demonstrate that viruses lacking ExoN activity are  
379 sensitive to the effects of an IFN- $\beta$ -mediated antiviral state. Further, our data reveal a critical role  
380 for nsp14 ExoN activity in CoV replication and provide additional rationale for targeting nsp14  
381 ExoN activity as a means of viral attenuation. Our future studies will probe the specific  
382 mechanism of restriction for viruses lacking ExoN activity and assess how the requirement of  
383 ExoN activity for resistance to innate immunity can be utilized for treatment during human  
384 coronavirus infections.

385

## 386 **MATERIALS AND METHODS**

387 **Cell culture.** Murine delayed brain tumor (DBT) cells (36) and baby hamster kidney 21 cells  
388 expressing the MHV receptor (BHK-R) (37) were maintained at 37°C in Dulbecco's modified  
389 Eagle medium (DMEM; Gibco) supplemented with 10% fetal bovine serum (FBS; Invitrogen),  
390 100 U/ml penicillin and streptomycin (Gibco), and 0.25  $\mu$ g/ml amphotericin B (Corning). BHK-  
391 R cells were further supplemented with 0.8 mg/ml of G418 (Mediatech).

392

393 **Cloning, recovery, and verification of mutant viruses.** Recombinant MHV strain A59  
394 (GenBank accession number AY910861) has been previously described (37). ExoN(-) (nsp14  
395 D89A and E91A) has been previously described (15). To generate ExoN(-) P250 virus, sub-  
396 confluent monolayers of DBT cells in 25cm<sup>2</sup> flasks were infected using the ExoN(-) parental  
397 stock and blindly passaged for a total of 250 passages (24). For ExoN3(-) virus (nsp14 D272A),

398 site-directed mutagenesis was used to engineer point mutations in the MHV genome cDNA F  
399 fragment plasmid using the MHV infectious clone reverse genetics system (37). ExoN3(-)  
400 mutant virus was recovered using BHK-R cells following electroporation of *in vitro*-transcribed  
401 genomic RNA. Recovered ExoN3(-) virus was sequenced (GenHunter Corporation, Nashville,  
402 TN) to verify the engineered mutations were present and to ensure that no additional mutations  
403 were introduced.

404

405 **Interferon- $\beta$  sensitivity assays.** Sub-confluent DBT cells were treated for 18 h with the  
406 indicated concentrations of mouse IFN- $\beta$  (PBL Assay Science) prior to infection with virus at a  
407 multiplicity of infection (MOI) of 1 plaque-forming unit (PFU) per cell at 37°C for 45 min. After  
408 incubation, inocula were removed, cells were washed with PBS, and fresh medium was added.  
409 Cell culture supernatants were collected at 12 h post-infection, and viral titers were determined  
410 by plaque assay (15).

411

412 **5-FU sensitivity assays.** Sub-confluent DBT cells were treated with DMEM supplemented to  
413 contain the indicated concentrations of 5-fluorouracil [(5-FU), Sigma] or DMSO alone at 37°C  
414 for 30 min. After incubation, drug was removed and cells were infected with virus at an MOI of  
415 1 PFU/cell at 37°C for 1 h. Inocula were removed, and cells were incubated in medium  
416 containing 5-FU or DMSO. Cell culture supernatants were collected at 12 h post-infection, and  
417 viral titers were determined by plaque assay.

418

419 **Virus replication kinetics.** Bone-marrow derived macrophages (BMMs) were generated from  
420 the hind limbs of WT, IFNAR<sup>-/-</sup>, or RNaseL<sup>-/-</sup>/PKR<sup>-/-</sup> C57/B6 mice as previously described

421 (11). BMMs were infected with virus at an MOI of 1 PFU/cell at 37°C for 1 h. After incubation,  
422 inocula were removed, cells were washed with 3 times with PBS, and fresh medium was added.  
423 At the indicated times post-infection, cell culture supernatant aliquots were collected and viral  
424 titers determined by plaque assay.

425

426 **Interferon- $\beta$  induction assays.** Sub-confluent DBT cells were infected with mock, WT, ExoN(-  
427 ), or ExoN(-) P250 virus at an MOI of 0.1 PFU/cell or with Sendai virus (SenV) at an MOI of  
428 200 HA (hemagglutination units)/ml at 37°C for 45 min. Inocula were removed, cells were  
429 washed with PBS, and fresh medium was added. At the indicated times post-infection, cell  
430 culture supernatants were removed and cell lysates were harvested by adding 1ml TRIzol  
431 reagent. Total RNA present in the lysates was purified using the phenol/chloroform method.  
432 cDNA was generated by reverse transcriptase-polymerase chain reaction (RT-PCR) using 1 $\mu$ g of  
433 total RNA as previously described (16). Mouse IFN- $\beta$  expression levels were determined  
434 relative to GAPDH by qPCR using the Applied Biosciences 7500 Real-Time PCR System with  
435 Power SYBR Green PCR Master Mix and IFN- $\beta$  primers: FWD: 5'-  
436 TCCGCCCTGTAGGTGAGGTTGAT-3' and REV: 5'-GTTCTGCTGTGCTTCTCCACCA-3'  
437 and GAPDH primers previously reported (16).

438

439 **Determination of rRNA integrity.** Sub-confluent monolayers of DBT cells were treated with 0  
440 or 50 U/ml mouse IFN- $\beta$  for 18 h prior to being infected with virus at an MOI of 1 PFU/cell at  
441 37°C for 45 min. After incubation, inocula were removed, cells were washed with PBS, and  
442 fresh medium was added. At the indicated times post-infection, cell culture supernatants were  
443 removed and total RNA was harvested by adding 1ml TRIzol reagent. For a positive control,

444 cells were transfected with 25ug/ml polyI:C (Sigma) using Lipofectamine 2000 (Thermo Fisher  
445 Scientific). Total RNA from all samples was purified using the Purelink RNA Mini Purification  
446 System (Life Technologies) by following the manufacturers instructions. Upon purification, total  
447 RNA was analyzed on an Agilent Bioanalyzer by the Vanderbilt VANTAGE core facility and  
448 the rRNA integrity reported.

449

450 **Quantification of viral genomic RNA by qRT-PCR.** The quantification of viral genomic RNA  
451 has been previously described (14). Briefly, an RNA standard was prepared using the MHV A  
452 fragment (37) and a standard curve was generated using 10-fold dilutions from  $10^3$  to  $10^8$  copies.  
453 A 5' 6-carboxyfluorescein (FAM)-labeled probe (5'-TTCTGACAACGGCTACACCCAACG-3'  
454 [Biosearch Technologies]) was used with forward (5'-AGAAGGTTACTGGCAACTG-3') and  
455 reverse (5'-TGTCCACGGCTAAATCAAAC-3') nsp2 specific primers. The final volume for  
456 each reaction was 20  $\mu$ l with 150 nM probe, 900 nM each primer, 2  $\mu$ l sample RNA, and 10  $\mu$ l  
457 2X ToughMix, one-step, low ROX enzyme mix (Quantas) per reaction. Samples were quantified  
458 using an Applied Biosciences 7500 Real-Time PCR System with the conditions 55°C for 10 min,  
459 95°C for 5 min, 95°C for 30 s, and 60°C for 1 min, with the last two steps repeated 40 times. The  
460 standard curve was plotted using GraphPad Prism 6 software, and genomes/ $\mu$ l were calculated.

461

462 **Quantification of subgenomic RNA by qPCR.** Sub-confluent DBT cells were treated with 0 or  
463 100 U/mL mouse IFN- $\beta$  for 18 h prior to being infected with virus at an MOI of 1 PFU/cell at  
464 37°C for 45 min. After incubation, inocula were removed, cells were washed with PBS, and  
465 fresh medium was added. At the indicated times post-infection, cell culture supernatants were  
466 removed and total RNA was harvested by adding 1ml TRIzol reagent. Total RNA was extracted

467 using the Purelink RNA mini purification system by following the manufacturers instructions.  
468 cDNA was generated by RT-PCR using 1ug of total RNA as previously described (16). Primers  
469 used to detect subgenomic nucleocapsid and GAPDH gene expression have been reported (16,  
470 38). Subgenomic (N) expression levels relative to GAPDH were determined using the Applied  
471 Biosciences 7500 Real-Time PCR System with Power SYBR Green PCR Master Mix.

472

473 **Determination of specific infectivity.** Sub-confluent monolayers of DBT cells were infected  
474 with virus at an MOI of 1 PFU/cell at 37°C for 45 min. After incubation, inocula were removed,  
475 cells were washed with PBS, and fresh medium was added. At 12 h post-infection, cell culture  
476 supernatants were collected, and viral titers were determined by plaque assay. Supernatants also  
477 were used for RNA genome isolation by adding 100 µl supernatant to 900 µl TRIzol reagent,  
478 chloroform extraction by phase separation, and final purification using the PureLink RNA Mini  
479 Purification System. Genome RNA was quantified using one-step qRT-PCR as described above,  
480 and the particle to PFU ratio was calculated.

481

482 **Co-infection assay.** Sub-confluent monolayers of DBT cells were treated with 0 or 100 U/ml  
483 mouse IFN-β for 18 h prior to being infected with virus at an MOI of 1 PFU/cell at 37°C for 45  
484 min. After incubation, inocula were removed, cells were washed with PBS, and fresh medium  
485 was added. At 12 h post-infection, cell culture supernatants were removed and 100 µl of  
486 supernatant was added to 900 µl TRIzol reagent. Viral genome RNA was purified and the  
487 number of viral genome RNA copies present relative to an RNA standard curve were determined  
488 as described above. Based on the number of viral genome RNA copies determined by qRT-PCR,  
489 an equal number of virus particles from each virus and each condition were combined with an

490 equal number of WT silent or ExoN(-) silent virus particles, respectively. WT silent and ExoN(-)  
491 silent viruses were engineered to harbor 10 silent mutations in the probe-binding region of nsp2,  
492 allowing separate detection from WT-MHV or ExoN(-) virus genomes, respectively, using a  
493 separate probe upon co-infection (24). Next, a fresh, sub-confluent monolayer of DBT cells were  
494 co-infected with each combination of viruses at 37°C for 45 min. After incubation, inocula were  
495 removed, cells were washed with PBS, and fresh medium was added. At 24 h post-infection, cell  
496 culture supernatants were removed and 100 µl of supernatant was added to 900 µl TRIzol  
497 reagent. Viral genome RNA was purified. The number of viral genome RNA copies of both  
498 reference and silent viruses were determined relative to the appropriate standard curve. The  
499 number of viral genome RNA copies relative to the number of silent virus genome RNA copies  
500 was determined for each virus and condition. Values are reported as the change in fitness relative  
501 to the silent virus.

502

503 **Statistical analysis.** Statistical tests were applied as noted in the respective figure legends and  
504 were determined using GraphPad Prism 6 software (La Jolla, CA).

505

## 506 **ACKNOWLEDGMENTS**

507 We thank members of the Vanderbilt Technologies for Advanced Genomics (VANTAGE) core  
508 for rRNA integrity determination services. We thank fellow members of the Denison and Weiss  
509 laboratories, specifically Maria Agostini, for helpful discussions. This work was supported by  
510 Public Health Service awards T32 HL07751 (J.B.C.) from the National Heart, Lung, and Blood  
511 Institute, R01 AI108197 (M.R.D.), and R01 AI104887 (S.R.W.) from the National Institute of  
512 Allergy and Infectious Diseases. Additional support was provided by the Elizabeth B. Lamb

513 Center for Pediatric Research.

514



## 515 REFERENCES

- 516 1. **Roth-Cross JK, Martínez-Sobrido L, Scott EP, García-Sastre A, Weiss SR.** 2007.  
517 Inhibition of the alpha/beta interferon response by mouse hepatitis virus at multiple levels.  
518 *J Virol* **81**:7189–7199.
- 519 2. **Frieman M, Heise M, Baric R.** 2008. SARS coronavirus and innate immunity. *Virus*  
520 *Res.* **133**:101–112.
- 521 3. **Rose KM, Weiss SR.** 2009. Murine Coronavirus Cell Type Dependent Interaction with  
522 the Type I Interferon Response. *Viruses* **1**:689–712.
- 523 4. **Schneider WM, Chevillotte MD, Rice CM.** 2014. Interferon-stimulated genes: a  
524 complex web of host defenses. *Annu. Rev. Immunol.* **32**:513–545.
- 525 5. **Kamitani W, Narayanan K, Huang C, Lokugamage K, Ikegami T, Ito N, Kubo H,**  
526 **Makino S.** 2006. Severe acute respiratory syndrome coronavirus nsp1 protein suppresses  
527 host gene expression by promoting host mRNA degradation. *Proc. Natl. Acad. Sci. U.S.A.*  
528 **103**:12885–12890.
- 529 6. **Zhang R, Li Y, Cowley TJ, Steinbrenner AD, Phillips JM, Yount BL, Baric RS,**  
530 **Weiss SR.** 2015. The nsp1, nsp13, and M proteins contribute to the hepatotropism of  
531 murine coronavirus JHM.WU. *J. Virol.* **89**:3598–3609.
- 532 7. **Devaraj SG, Wang N, Chen Z, Chen Z, Tseng M, Barretto N, Lin R, Peters CJ,**  
533 **Tseng C-TK, Baker SC, Li K.** 2007. Regulation of IRF-3-dependent innate immunity by  
534 the papain-like protease domain of the severe acute respiratory syndrome coronavirus. *J.*  
535 *Biol. Chem.* **282**:32208–32221.
- 536 8. **Barretto N, Jukneliene D, Ratia K, Chen Z, Mesecar AD, Baker SC.** 2005. The  
537 papain-like protease of severe acute respiratory syndrome coronavirus has  
538 deubiquitinating activity. *J. Virol.* **79**:15189–15198.
- 539 9. **Chen Y, Cai H, Pan J, Xiang N, Tien P, Ahola T, Guo D.** 2009. Functional screen  
540 reveals SARS coronavirus nonstructural protein nsp14 as a novel cap N7  
541 methyltransferase. *Proc Natl Acad Sci USA* **106**:3484–3489.
- 542 10. **Decroly E, Imbert I, Coutard B, Bouvet M, Selisko B, Alvarez K, Gorbalenya AE,**  
543 **Snijder EJ, Canard B.** 2008. Coronavirus nonstructural protein 16 is a cap-0 binding  
544 enzyme possessing (nucleoside-2'O)-methyltransferase activity. *J. Virol.* **82**:8071–8084.
- 545 11. **Zhao L, Jha BK, Wu A, Elliott R, Ziebuhr J, Gorbalenya AE, Silverman RH, Weiss**  
546 **SR.** 2012. Antagonism of the interferon-induced OAS-RNase L pathway by murine  
547 coronavirus ns2 protein is required for virus replication and liver pathology. *Cell Host*  
548 *Microbe* **11**:607–616.
- 549 12. **Kindler E, Gil-Cruz C, Spanier J, Li Y, Wilhelm J, Rabouw HH, Züst R, Hwang M,**  
550 **V'kovski P, Stalder H, Marti S, Habjan M, Cervantes-Barragan L, Elliot R, Karl N,**  
551 **Gaughan C, van Kuppeveld FJM, Silverman RH, Keller M, Ludewig B, Bergmann**  
552 **CC, Ziebuhr J, Weiss SR, Kalinke U, Thiel V.** 2017. Early endonuclease-mediated  
553 evasion of RNA sensing ensures efficient coronavirus replication. *PLoS Pathog.*  
554 **13**:e1006195.
- 555 13. **Minskaia E, Hertzog T, Gorbalenya AE, Campanacci V, Cambillau C, Canard B,**  
556 **Ziebuhr J.** 2006. Discovery of an RNA virus 3'→5' exoribonuclease that is critically  
557 involved in coronavirus RNA synthesis. *Proc Natl Acad Sci USA* **103**:5108–5113.
- 558 14. **Case JB, Ashbrook AW, Dermody TS, Denison MR.** 2016. Mutagenesis of S-  
559 Adenosyl-l-Methionine-Binding Residues in Coronavirus nsp14 N7-Methyltransferase

- 560 Demonstrates Differing Requirements for Genome Translation and Resistance to Innate  
561 Immunity. *J. Virol.* **90**:7248–7256.
- 562 15. **Eckerle LD, Lu X, Sperry SM, Choi L, Denison MR.** 2007. High fidelity of murine  
563 hepatitis virus replication is decreased in nsp14 exoribonuclease mutants. *J Virol*  
564 **81**:12135–12144.
- 565 16. **Smith EC, Blanc H, Vignuzzi M, Denison MR.** 2013. Coronaviruses lacking  
566 exoribonuclease activity are susceptible to lethal mutagenesis: evidence for proofreading  
567 and potential therapeutics. *PLoS Pathog* **9**:e1003565.
- 568 17. **Graham RL, Becker MM, Eckerle LD, Bolles M, Denison MR, Baric RS.** 2012. A  
569 live, impaired-fidelity coronavirus vaccine protects in an aged, immunocompromised  
570 mouse model of lethal disease. *Nat Med* **18**:1820–1826.
- 571 18. **Qi X, Lan S, Wang W, Schelde LM, Dong H, Wallat GD, Ly H, Liang Y, Dong C.**  
572 2010. Cap binding and immune evasion revealed by Lassa nucleoprotein structure. *Nature*  
573 **468**:779–783.
- 574 19. **Hastie KM, Kimberlin CR, Zandonatti MA, MacRae IJ, Sapphire EO.** 2011. Structure  
575 of the Lassa virus nucleoprotein reveals a dsRNA-specific 3' to 5' exonuclease activity  
576 essential for immune suppression. *PNAS* **108**:2396–2401.
- 577 20. **Russier M, Reynard S, Carnec X, Baize S.** 2014. The exonuclease domain of Lassa  
578 virus nucleoprotein is involved in antigen-presenting-cell-mediated NK cell responses. *J.*  
579 *Virol.* **88**:13811–13820.
- 580 21. **Becares M, Pascual-Iglesias A, Nogales A, Sola I, Enjuanes L, Zuñiga S.** 2016.  
581 Mutagenesis of Coronavirus nsp14 Reveals Its Potential Role in Modulation of the Innate  
582 Immune Response. *J. Virol.* **90**:5399–5414.
- 583 22. **Rose KM, Elliott R, Martínez-Sobrido L, García-Sastre A, Weiss SR.** 2010. Murine  
584 coronavirus delays expression of a subset of interferon-stimulated genes. *J Virol* **84**:5656–  
585 5669.
- 586 23. **Ma Y, Wu L, Shaw N, Gao Y, Wang J, Sun Y, Lou Z, Yan L, Zhang R, Rao Z.** 2015.  
587 Structural basis and functional analysis of the SARS coronavirus nsp14-nsp10 complex.  
588 *PNAS* **112**:9436–9441.
- 589 24. **Graepel K, Lu X, Case JB, Sexton NR, Smith EC, Denison MR.** 2017. Proofreading-  
590 deficient coronaviruses adapt over long-term passage for increased fidelity and fitness  
591 without reversion of exoribonuclease-inactivating mutations. *bioRxiv*.
- 592 25. **Zhao L, Rose KM, Elliott R, Van Rooijen N, Weiss SR.** 2011. Cell-type-specific type I  
593 interferon antagonism influences organ tropism of murine coronavirus. *J. Virol.*  
594 **85**:10058–10068.
- 595 26. **Zhao L, Birdwell LD, Wu A, Elliott R, Rose KM, Phillips JM, Li Y, Grinspan J,**  
596 **Silverman RH, Weiss SR.** 2013. Cell-type-specific activation of the oligoadenylate  
597 synthetase-RNase L pathway by a murine coronavirus. *J. Virol.* **87**:8408–8418.
- 598 27. **Tomaselli S, Galeano F, Locatelli F, Gallo A.** 2015. ADARs and the Balance Game  
599 between Virus Infection and Innate Immune Cell Response. *Curr Issues Mol Biol* **17**:37–  
600 51.
- 601 28. **Neil S, Bieniasz P.** 2009. Human immunodeficiency virus, restriction factors, and  
602 interferon. *J. Interferon Cytokine Res.* **29**:569–580.
- 603 29. **Gu J, Korteweg C.** 2007. Pathology and pathogenesis of severe acute respiratory  
604 syndrome. *Am. J. Pathol.* **170**:1136–1147.
- 605 30. **Birdwell LD, Zalinger ZB, Li Y, Wright PW, Elliott R, Rose KM, Silverman RH,**

- 606 **Weiss SR.** 2016. Activation of RNase L by Murine Coronavirus in Myeloid Cells Is  
607 Dependent on Basal Oas Gene Expression and Independent of Virus-Induced Interferon. *J.*  
608 *Virool.* **90**:3160–3172.
- 609 31. **Malathi K, Dong B, Gale M, Silverman RH.** 2007. Small self-RNA generated by RNase  
610 L amplifies antiviral innate immunity. *Nature* **448**:816–819.
- 611 32. **Bouvet M, Imbert I, Subissi L, Gluais L, Canard B, Decroly E.** 2012. RNA 3'-end  
612 mismatch excision by the severe acute respiratory syndrome coronavirus nonstructural  
613 protein nsp10/nsp14 exoribonuclease complex. *Proc. Natl. Acad. Sci. U.S.A.* **109**:9372–  
614 9377.
- 615 33. **Lahouassa H, Daddacha W, Hofmann H, Ayinde D, Logue EC, Dragin L, Bloch N,**  
616 **Maudet C, Bertrand M, Gramberg T, Pancino G, Priet S, Canard B, Laguette N,**  
617 **Benkirane M, Transy C, Landau NR, Kim B, Margottin-Goguet F.** 2012. SAMHD1  
618 restricts the replication of human immunodeficiency virus type 1 by depleting the  
619 intracellular pool of deoxynucleoside triphosphates. *Nat. Immunol.* **13**:223–228.
- 620 34. **Hrecka K, Hao C, Gierszewska M, Swanson SK, Kesik-Brodacka M, Srivastava S,**  
621 **Florens L, Washburn MP, Skowronski J.** 2011. Vpx relieves inhibition of HIV-1  
622 infection of macrophages mediated by the SAMHD1 protein. *Nature* **474**:658–661.
- 623 35. **Sanjuán R, Domingo-Calap P.** 2016. Mechanisms of viral mutation. *Cell. Mol. Life Sci.*  
624 **73**:4433–4448.
- 625 36. **Chen W, Baric RS.** 1996. Molecular anatomy of mouse hepatitis virus persistence:  
626 coevolution of increased host cell resistance and virus virulence. *J. Virool.* **70**:3947–3960.
- 627 37. **Yount B, Denison MR, Weiss SR, Baric RS.** 2002. Systematic Assembly of a Full-  
628 Length Infectious cDNA of Mouse Hepatitis Virus Strain A59. *J. Virool.* **76**:11065–11078.
- 629 38. **Donaldson EF, Sims AC, Graham RL, Denison MR, Baric RS.** 2007. Murine hepatitis  
630 virus replicase protein nsp10 is a critical regulator of viral RNA synthesis. *J. Virool.*  
631 **81**:6356–6368.

632  
633  
634  
635  
636  
637  
638  
639

## FIGURE LEGENDS

640 **FIG 1.** Viruses lacking ExoN activity are sensitive to IFN- $\beta$  pretreatment. (A) DBT cells were  
641 pretreated with the indicated concentrations of mouse IFN- $\beta$  for 18 h and then infected with WT-  
642 MHV or ExoN(-) virus (A) or WT, ExoN(-), or ExoN3(-) virus (C) at an MOI of 1 PFU/cell. At  
643 12 h post-infection, cell culture supernatants were collected and the viral titers present  
644 determined by plaque assay. (B) DBT cells were pretreated with the indicated concentrations of  
645 5-FU for 30 min. Following pretreatment, cells were infected with WT, ExoN(-), or ExoN3(-)

646 virus at an MOI of 1 PFU/cell for 45 min., inocula were removed, and fresh medium containing  
647 vehicle or the appropriate concentration of 5-FU were added. Cell culture supernatants were  
648 harvested 12 h post-infection and viral titers were determined by plaque assay. For each panel,  
649 the change in viral titer was calculated by dividing viral titers following the indicated treatment  
650 by the untreated controls and error bars indicate SEM (n = 4). Statistical significance compared  
651 to WT-MHV is denoted and was determined by Student's *t*-test. \*,  $P < 0.05$ , \*\* $P < 0.01$ , \*\*\*  $P$   
652  $< 0.001$ .

653  
654 **FIG 2.** Increased replication capacity does not restore virus resistance to IFN- $\beta$ . DBT cells were  
655 pretreated with the indicated concentrations of mouse IFN- $\beta$  for 18 h and then infected with WT,  
656 ExoN(-), or ExoN(-) P250 virus at an MOI of 1 PFU/cell. At 12 h post-infection, cell culture  
657 supernatants were collected and the viral titers present determined by plaque assay. Raw viral  
658 titers (A) or the change in viral titers relative to untreated controls (B) are reported. Error bars  
659 indicate SEM (n = 4). Statistical significance compared to WT-MHV is denoted and was  
660 determined by Student's *t*-test. \*,  $P < 0.05$ , \*\* $P < 0.01$ , \*\*\*  $P < 0.001$ .

661  
662 **FIG 3.** Replication of viruses lacking ExoN activity is restricted in wild-type B6 BMMs. B6  
663 BMMs or IFNAR $^{-/-}$  BMMs were infected with WT-MHV or ExoN(-) virus (A) or WT-MHV or  
664 ExoN(-) P250 virus (B) at an MOI of 1 PFU/cell. At the indicated times post-infection, cell  
665 culture supernatant aliquots were collected and the viral titers present were determined by plaque  
666 assay. For each panel, error bars represent SEM (n = 6 to 7). ND = not detectable.

667  
668 **FIG 4.** Loss of ExoN activity does not result in the generation of a detectable PAMP. (A) DBT

669 cells were infected with mock, WT, ExoN(-) or ExoN(-) P250 virus at an MOI of 0.1 PFU/cell or  
670 infected with Sendai virus at an MOI of 200 HA units/ml. At the indicated times post-infection,  
671 cell culture supernatants were removed, cell lysates were harvested, total RNA was extracted,  
672 cDNA was generated, and IFN- $\beta$  expression relative to GAPDH was determined by qPCR. Error  
673 bars indicate SEM (n=4). (B) DBT cells were pretreated for 18 h with 0 or 50U/ml mouse IFN- $\beta$   
674 and subsequently infected with WT-MHV or ExoN(-) virus or transfected with 25 $\mu$ g/ml poly I:C.  
675 At the indicated times post-infection, cell culture supernatants were removed, cell lysates  
676 harvested, and total RNA extracted. rRNA integrity was assessed using an Agilent Bioanalyzer.  
677 One representative image is shown for each sample from 2 independent experiments. Images  
678 spliced for labeling purposes. The averaged RNA integrity values for each condition are  
679 reported. (C) B6 BMMs or RL -/- / PKR -/- BMMs were infected with WT-MHV or ExoN(-)  
680 virus at an MOI of 1 PFU/cell. At the indicated times post-infection, cell culture supernatant  
681 aliquots were collected and the viral titers present were determined by plaque assay. Error bars  
682 represent SEM (n = 5). ND = not detectable.

683

684 **FIG 5.** ExoN(-) viral RNA accumulation and particle release is marginally affected by IFN- $\beta$   
685 pretreatment. DBT cells were pretreated with 0 or 100U/ml mouse IFN- $\beta$  for 18 h and  
686 subsequently infected with WT-MHV or ExoN(-) virus at an MOI of 1 PFU/cell. At the indicated  
687 times post-infection, total cell lysates were harvested and RNA was extracted. The viral genomic  
688 RNA copies present relative to an RNA standard were determined by one-step qRT-PCR (A) or  
689 cDNA was generated and the subgenomic RNA copies relative to GAPDH were determined by  
690 qPCR (B). For each panel (A and B), error bars represent SEM (n= 6 to 9). DBT cells were  
691 pretreated with 0 or 100U/ml mouse IFN- $\beta$  for 18 h and subsequently infected with WT-MHV or

692 ExoN(-) virus at an MOI of 1 PFU/cell. At 12 h post-infection, cell culture supernatants were  
693 collected. Equivalent volumes of cell culture supernatant for each sample were divided into two  
694 samples. For the first cell culture supernatant sample, total RNA was extracted and the number  
695 of virion genome RNA copies present (particles) was determined by one-step qRT-PCR (C) or  
696 reported as the change in virion genome RNA copies (D). Error bars represent SEM (n = 13 to  
697 15). Statistical significance compared to untreated WT-MHV or ExoN(-) infection, respectively,  
698 is denoted and was determined by Student's *t*-test. \*\*\*  $P < 0.001$ .

699

700 **FIG 6.** ExoN(-) viruses generated in the presence of an antiviral state have decreased specific  
701 infectivity and are less fit relative to untreated. (A) DBT cells were pretreated with 0 or 100U/ml  
702 mouse IFN- $\beta$  for 18 h and subsequently infected with WT-MHV or ExoN(-) virus at an MOI of 1  
703 PFU/cell. At 12 h post-infection, cell culture supernatants were collected. Equivalent volumes of  
704 cell culture supernatant for each sample were divided into two samples. For the first cell culture  
705 supernatant sample, total RNA was extracted and the number of virion genome RNA copies  
706 present (particles) was determined by one-step qRT-PCR [Fig. 5C]. For the second cell culture  
707 supernatant sample, the viral titer present was determined by plaque assay (PFUs) (data not  
708 shown). The particle to PFU ratio for each virus and treatment was calculated by dividing the  
709 number of particles by the number of PFUs. Error bars represent SEM (n = 13 to 15). (B) DBT  
710 cells were pretreated with 0 or 100 U/ml mouse IFN- $\beta$  for 18 h and subsequently infected with  
711 WT-MHV or ExoN(-) virus at an MOI of 1 PFU/cell. At 12 h post-infection, cell culture  
712 supernatants were harvested for each virus and treatment group and the number of virion genome  
713 RNA copies present (particles) in the supernatant was determined by one-step qRT-PCR. Using  
714 the determined number of particles, an equivalent number of virus particles from each virus and

715 treatment group were mixed with an equal number of WT silent or ExoN(-) silent virus particles.  
716 This mixture was then used to infect a fresh monolayer of untreated DBT cells. At 24 h post-  
717 infection, cell culture supernatants were collected, RNA was extracted, and the number of virion  
718 genome RNA copies for each original virus and treatment group relative to their respective silent  
719 standard viruses was determined by one-step qRT-PCR and is reported as the change in fitness  
720 relative to the silent virus standard. Error bars represent SEM (n=6). For each panel, statistical  
721 significance compared to untreated WT-MHV or ExoN(-) infection, respectively, is denoted and  
722 was determined by Student's *t*-test. \*,  $P < 0.05$ , \*\*\*  $P < 0.001$ , n.s.= not significant.

FIGURE 1.

**A**

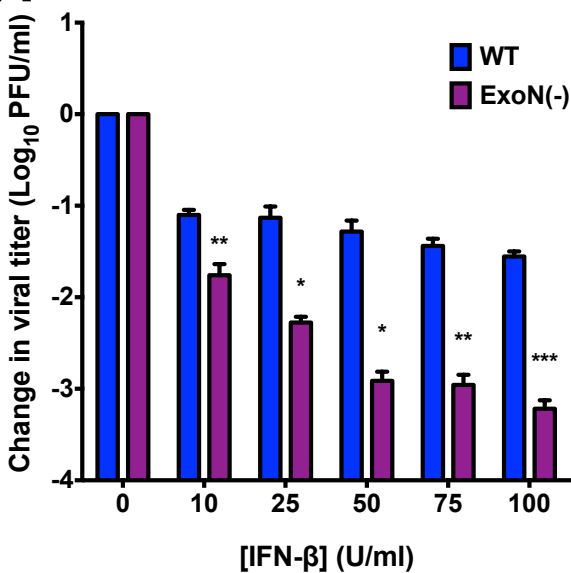

**B**

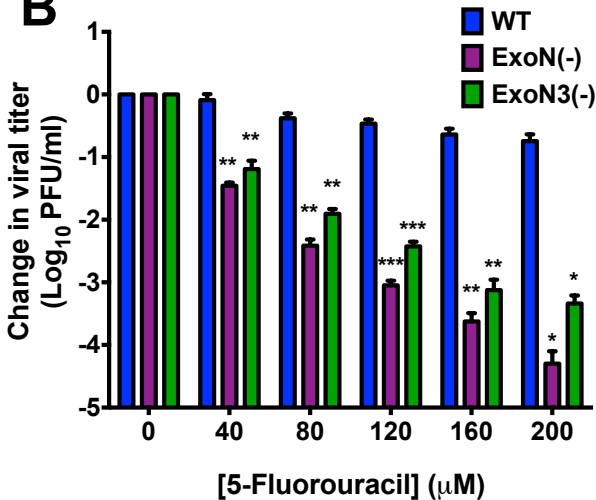

**C**

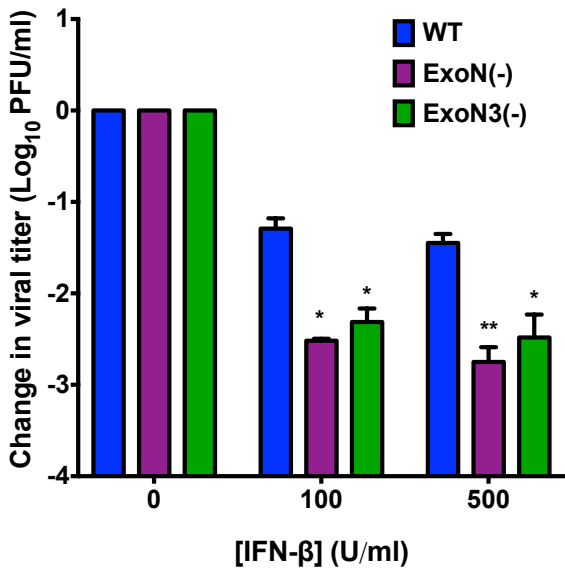



FIGURE 2.

**A**

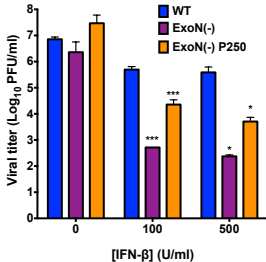

**B**

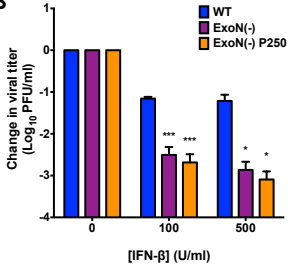

FIGURE 3.

**A**

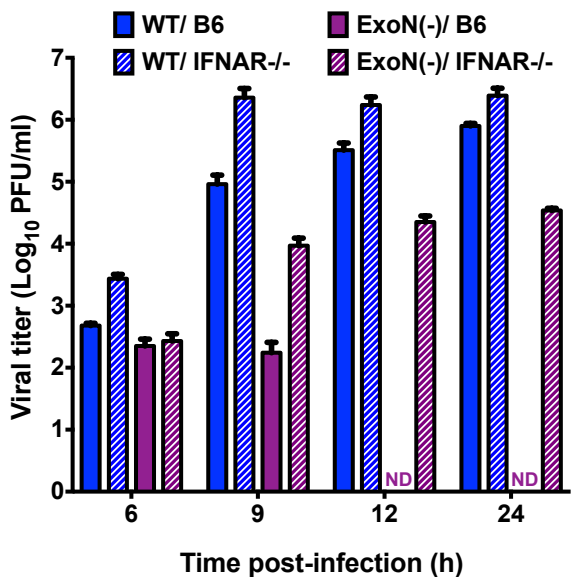

**B**

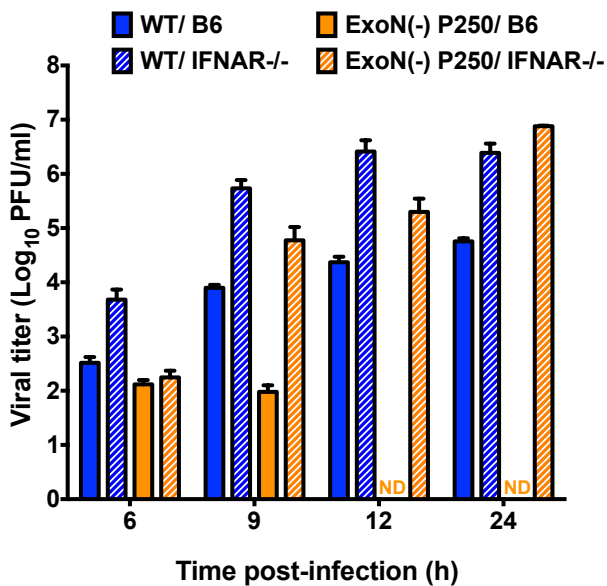

**FIGURE 4.**

**A**

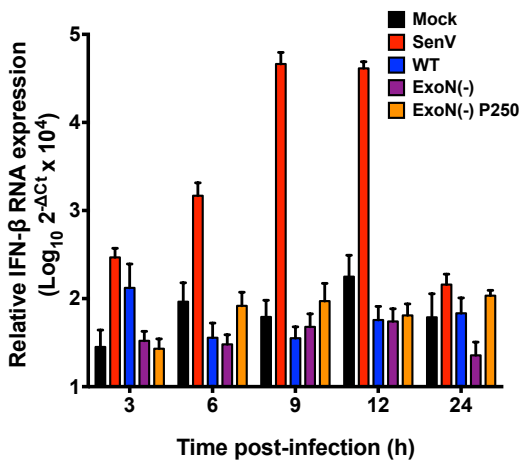

**B**

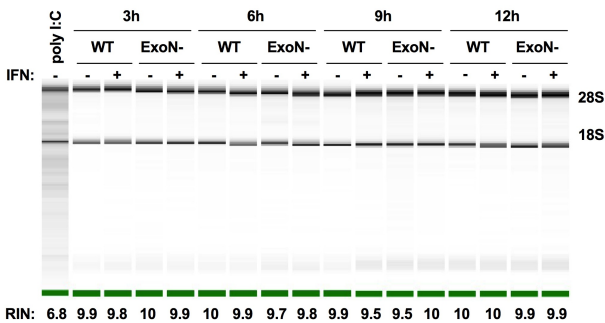

**C**

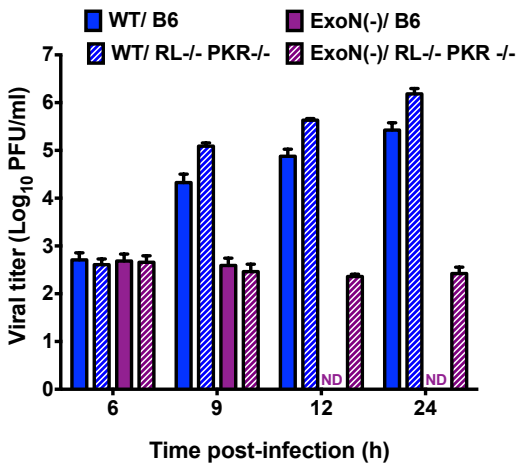

FIGURE 5.

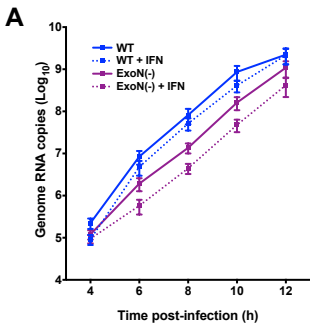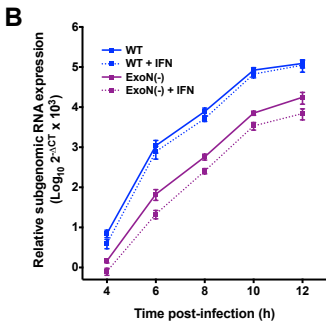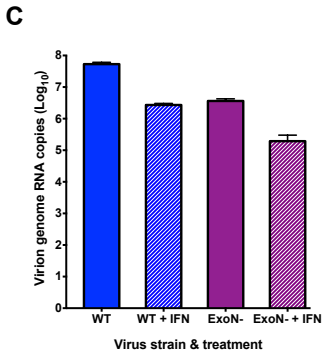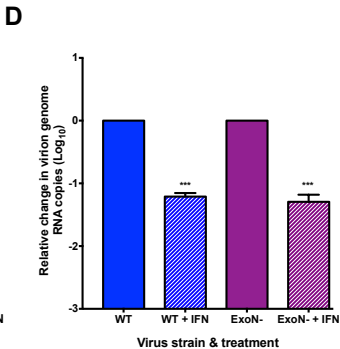

FIGURE 6.

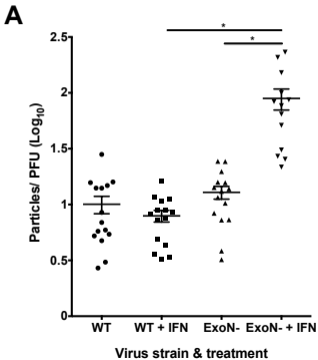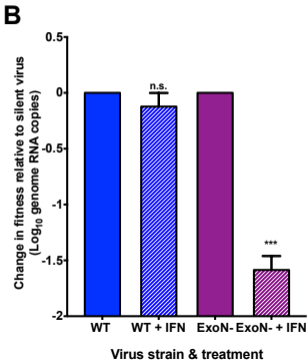

Source: https://www.biorxiv.org/content/10.1101/182196v1.full.pdf
